# Supplementary material for: Fabrication of nanocomposite MoC–Mo2C@C/Cd0.5Zn0.5S: promoted electron migration and improved photocatalytic hydrogen evolution
Source: Royal Society of Chemistry journal article supplement (doi:10.1039/d2dt00825d), 2022-01-01
Supplement: d2dt00825d1.pdf [file d2dt00825d1.pdf]

## Electronic Supplementary Information

### **Fabrication of nanocomposite MoC-Mo<sub>2</sub>C@C/Cd<sub>0.5</sub>Zn<sub>0.5</sub>S: promoted electron migration and improved photocatalytic hydrogen evolution**

Tingting Wei,<sup>‡a,b</sup> Tingting Zhang,<sup>‡a</sup> Zhanbin Jin,<sup>a,b</sup> Fengyan Li,<sup>\*a</sup> and Lin Xu<sup>\*a</sup>

<sup>a</sup> *Key Laboratory of Polyoxometalate and Reticular Material Chemistry of Ministry of Education, Department of Chemistry, Northeast Normal University, Changchun, Jilin 130024, P. R. China*

<sup>b</sup> *Department of Chemistry, Xinzhou Teachers University, Xinzhou, Shanxi 034000, P. R. China*

### **Characterization**

The crystal phase of obtained photocatalysts were characterized by X-ray diffraction (XRD, D/max200PC, Rigaku Japan) using Cu K $\alpha$  ( $\lambda = 1.5404$  Å) radiation. The 2-Theta (degree) ranged from 10° to 80° with a scanning rate of 20° min<sup>-1</sup>. Field-emission scanning electron microscopy (Hitachi SU-8000 FE-SEM) coupled with energy-dispersive X-ray (EDS) analysis were used to research morphology, crystallite sizes and surface chemical composition of all photocatalysts. Transmission electron microscopy (TEM, JEM-2100F) was also used to study the microstructure of the samples at an accelerating voltage of 200 kV. The UV-vis diffuse reflectance spectra (DRS) measurements were carried out on a UV-vis spectrophotometer (Varian Cary 500) in wavelength range from 300-800 nm. Barium sulfate was used as a reference material for baseline correction. X-ray photoelectron spectroscopy (XPS) measurements were carried out using USWHA150 with a monochromatic Al K $\alpha$  source. Photoluminescence (PL) measurements were conducted on FLSP920 Edinburgh Fluorescence Spectrometer at room temperature.

### **Photoelectrochemical Measurements**

Photoelectrochemical measurements were performed on 0.5 M Na<sub>2</sub>SO<sub>4</sub> solution with a three-electrode system, which a SCE electrode as the reference electrode, a Pt foil as the counter electrode and the FTO coated with samples as the working electrode, respectively. A 300 W Xe lamp (Beijing Perfectlight Technology Corp., China) coupled with a optical filter ( $\lambda > 420$  nm) was used as a light source. Transient photocurrent experiments were carried out at constant bias of 0 V at room temperature. The electrochemical impedance spectroscopy (EIS) measurements were measured at -0.3 V with an AC amplitude of 50 mV in the frequency range from 0.1 Hz to 100 kHz under illumination. All results were measured on the CHI660C Electrochemical Workstation (Shanghai Chenhua Instrument Corp., China) at room temperature.

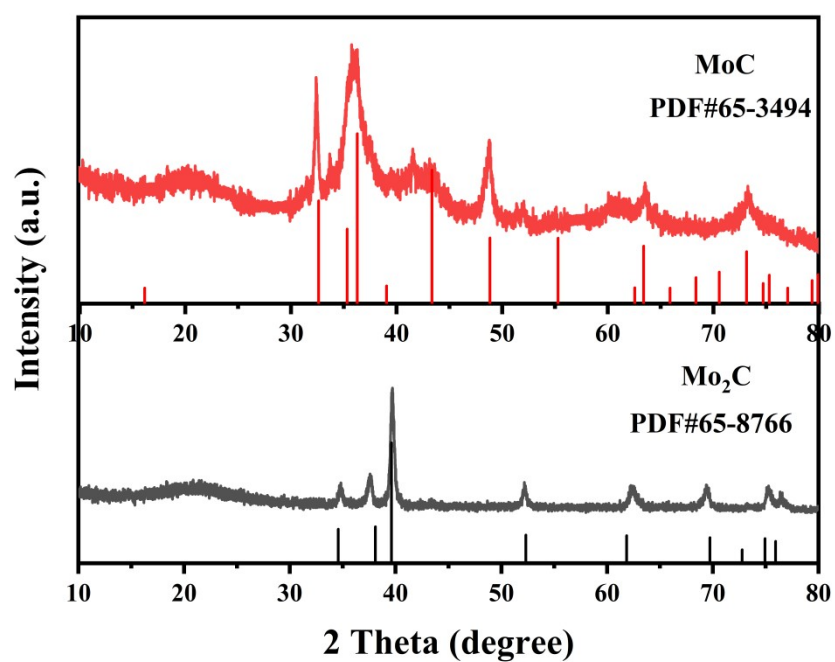

Fig. S1 XRD patterns of the MoC and Mo<sub>2</sub>C.

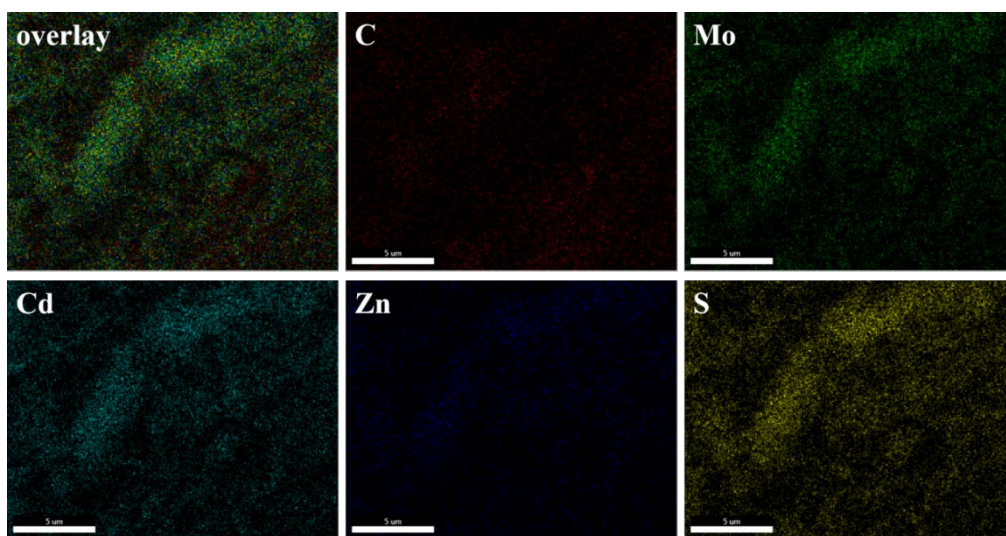

Fig. S2 SEM-mapping images of overlay, C, Mo, Cd, Zn and S in 2-MMC/ZCS.

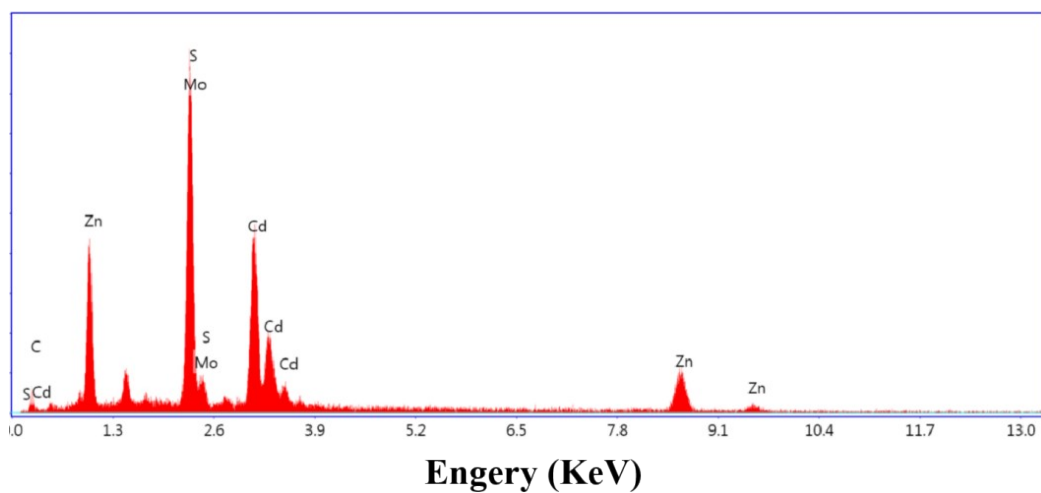

**Fig. S3** EDS spectra of 2-MMC/ZCS sample

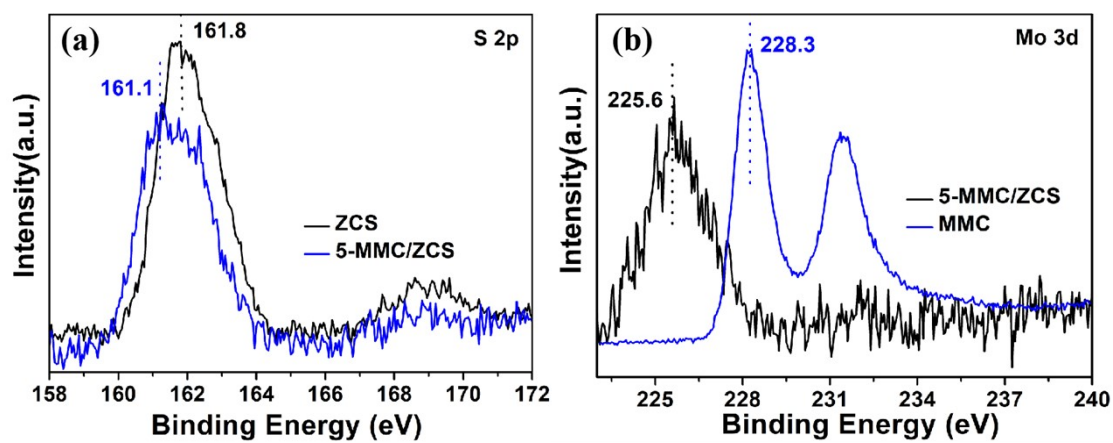

**Fig. S4** (a) S 2p in the prepared ZCS and 5-MMC/ZCS sample, (b) Mo 3d in the prepared MMC and 5-MMC/ZCS sample.

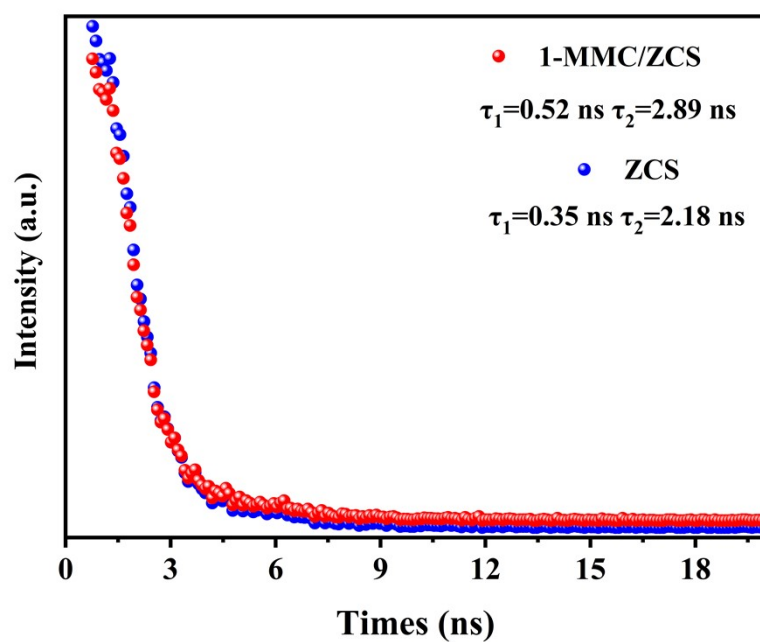

Fig. S5 Time-resolved fluorescence decay spectra.

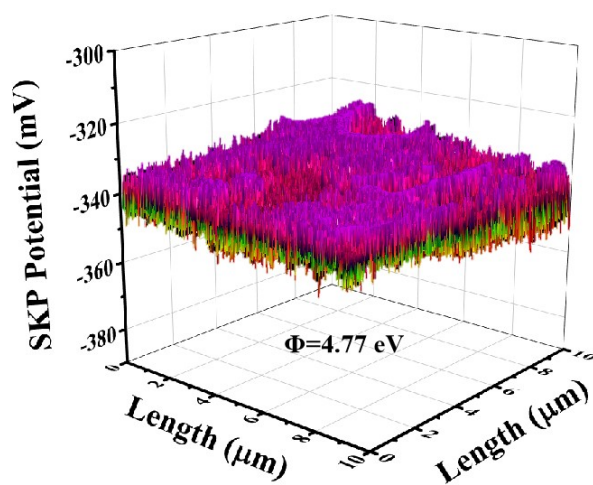

Fig. S6 Relative work function images of MMC.

Table S1. Based on the  $\text{Cd}_x\text{Zn}_{1-x}\text{S}$  system for photocatalytic hydrogen evolution.

| Cocatalysts | Light harvesting                         | Light source            | Weight(mg)/<br>Solution (mL),<br>sacrificial agent | Activity<br>( $\text{mmol g}^{-1} \text{h}^{-1}$ ) | A.Q.Y<br>(%) | Ref.         |
|-------------|------------------------------------------|-------------------------|----------------------------------------------------|----------------------------------------------------|--------------|--------------|
| 1-MMC       | $\text{Cd}_{0.5}\text{Zn}_{0.5}\text{S}$ | 300 W Xe<br>lamp with a | 25/200, 6.3 g<br>$\text{Na}_2\text{SO}_3$ and 16.8 | 68.7                                               | 32.9%        | This<br>work |

|                                     |                                                                       |                                            |                                                                             |                          |       |    |
|-------------------------------------|-----------------------------------------------------------------------|--------------------------------------------|-----------------------------------------------------------------------------|--------------------------|-------|----|
|                                     |                                                                       | 420 nm cut-off                             | g Na <sub>2</sub> S                                                         |                          |       |    |
| Au/g-C <sub>3</sub> N <sub>4</sub>  | Cd <sub>x</sub> Zn <sub>1-x</sub> S                                   | 300 W Xe lamp with a 420 nm cut-off filter | 50/100, 0.1 mol L <sup>-1</sup> glucose                                     | 0.123                    | --    | 1  |
| NiS                                 | Cd <sub>x</sub> Zn <sub>1-x</sub> S                                   | 300 W Xe lamp with a 420 nm cut-off filter | 100/100, 0.1 M Na <sub>2</sub> SO <sub>3</sub> and Na <sub>2</sub> S        | 0.512                    | --    | 2  |
| rGO                                 | Cd <sub>x</sub> Zn <sub>1-x</sub> S                                   | 300 W Xe lamp with a 420 nm cut-off filter | --/--, 0.25 M Na <sub>2</sub> SO <sub>3</sub> and 0.35M Na <sub>2</sub> S   | --                       | 19.4  | 3  |
| MoS <sub>2</sub>                    | Cd <sub>x</sub> Zn <sub>1-x</sub> S                                   | 300 W Xe lamp with a 420 nm cut-off filter | 10/100, 0.25 M Na <sub>2</sub> SO <sub>3</sub> and 0.35 M Na <sub>2</sub> S | 69.25                    | 55.2  | 4  |
| --                                  | Cd <sub>x</sub> Zn <sub>1-x</sub> S                                   | 300 W Xe lamp with a 420 nm cut-off filter | --/100, 0.25 M Na <sub>2</sub> SO <sub>3</sub> and 0.35M Na <sub>2</sub> S  | 717 μmol h <sup>-1</sup> | 28.69 | 5  |
| Cd-Zn-Fe PBA                        | Cd <sub>0.5</sub> Zn <sub>0.5</sub> S                                 | 300 W Xe lamp with a 420 nm cut-off filter | 50/250, 0.25 M Na <sub>2</sub> SO <sub>3</sub> and 0.35 M Na <sub>2</sub> S | 4.34                     | 4.5   | 6  |
| Pt/PdS                              | Cd <sub>0.5</sub> Zn <sub>0.5</sub> S-P                               | 300 W Xe lamp with a 420 nm cut-off filter | 10/100, 0.1 M Na <sub>2</sub> S-Na <sub>2</sub> SO <sub>3</sub>             | --                       | 80    | 7  |
| Ni <sub>2</sub> P                   | SiO <sub>2</sub> /rGO/Cd <sub>0.5</sub> Zn <sub>0.5</sub> S           | 300 W Xe lamp with a 420 nm cut-off filter | 30/50, 0.5 M Na <sub>2</sub> SO <sub>3</sub> and 0.7M Na <sub>2</sub> S     | 11.65                    | 15.6  | 8  |
| --                                  | Mo <sub>3</sub> S <sub>4</sub> /Cd <sub>0.5</sub> Zn <sub>0.5</sub> S | 300 W Xe lamp with a 420 nm cut-off filter | 30/60, 0.3 M Na <sub>2</sub> S-Na <sub>2</sub> SO <sub>3</sub>              | 72.1                     | 9.6   | 9  |
| NiSe                                | Cd <sub>0.5</sub> Zn <sub>0.5</sub> S                                 | 300 W Xe lamp with a 420 nm cut-off filter | 10/100, 0.25 M Na <sub>2</sub> SO <sub>3</sub> and 0.35M Na <sub>2</sub> S  | 78.1                     | 46    | 10 |
| Ni <sub>3</sub> N/Ni <sub>4</sub> N | Cd <sub>0.5</sub> Zn <sub>0.5</sub> S                                 | 300 W Xe lamp with a                       | 1/200, 0.25 M Na <sub>2</sub> SO <sub>3</sub> and 0.35                      | 241.3                    | 43.8  | 11 |

|                                                                             |                                       |                                            |                                                                              |                            |       |    |
|-----------------------------------------------------------------------------|---------------------------------------|--------------------------------------------|------------------------------------------------------------------------------|----------------------------|-------|----|
|                                                                             |                                       | 420 nm cut-off filter                      | M Na <sub>2</sub> S                                                          |                            |       |    |
| Cu <sub>3</sub> P                                                           | Cd <sub>0.5</sub> Zn <sub>0.5</sub> S | 300 W Xe lamp with a 420 nm cut-off filter | 25/100, 0.25 M Na <sub>2</sub> SO <sub>3</sub> and 0.35 M Na <sub>2</sub> S  | 12.84                      | 17.5  | 12 |
| Potassium-doped-C <sub>3</sub> N <sub>4</sub>                               | Cd <sub>0.5</sub> Zn <sub>0.5</sub> S | 300 W Xe lamp with a 420 nm cut-off filter | 50/50, triethanolamine aqueous solution                                      | 1.83                       | --    | 13 |
| β-NaYF <sub>4</sub> :Yb <sup>3+</sup> , Tm <sup>3+</sup> , Er <sup>3+</sup> | Cd <sub>0.5</sub> Zn <sub>0.5</sub> S | 300 W Xe lamp with a 420 nm cut-off filter | 10/250, 0.25 M Na <sub>2</sub> SO <sub>3</sub> and 0.35 M Na <sub>2</sub> S  | 159.3                      | 24.2  | 14 |
| Ni <sub>x</sub> Co <sub>1-x</sub> P                                         | Cd <sub>0.5</sub> Zn <sub>0.5</sub> S | 300 W Xe lamp with a 420 nm cut-off filter | --/100, 0.25 M Na <sub>2</sub> SO <sub>3</sub> and 0.35 M Na <sub>2</sub> S  | 976 μmol · h <sup>-1</sup> | 19.7  | 15 |
| MoS <sub>2</sub>                                                            | Cd <sub>0.5</sub> Zn <sub>0.5</sub> S | 300 W Xe lamp with a 420 nm cut-off filter | 20/80, lactic acid                                                           | 40.2                       | 33.4  | 16 |
| Co <sub>x</sub> Mo <sub>1-x</sub> S                                         | Cd <sub>0.5</sub> Zn <sub>0.5</sub> S | 300 W Xe lamp with a 420 nm cut-off filter | 50/300, 0.25 M Na <sub>2</sub> SO <sub>3</sub> and 0.35 M Na <sub>2</sub> S  | 3.77                       | 16.72 | 17 |
| Co <sub>3</sub> N                                                           | Cd <sub>0.5</sub> Zn <sub>0.5</sub> S | 300 W Xe lamp with a 420 nm cut-off filter | 1/200, 0.25 M Na <sub>2</sub> SO <sub>3</sub> and 0.35 M Na <sub>2</sub> S   | 160.7                      | 30.2  | 18 |
| Ni <sub>2</sub> P                                                           | Cd <sub>0.5</sub> Zn <sub>0.5</sub> S | LED lamps with a 420 nm cut-off filter     | 5/105, 0.25 M Na <sub>2</sub> SO <sub>3</sub> and 0.35 M Na <sub>2</sub> S   | 21.19                      | 21.16 | 19 |
| Ni <sub>2</sub> P                                                           | Cd <sub>0.5</sub> Zn <sub>0.5</sub> S | 300 W Xe lamp with a 400 nm cut-off filter | 100/100, 0.25 M Na <sub>2</sub> SO <sub>3</sub> and 0.35 M Na <sub>2</sub> S | 9.12                       | 37.5  | 20 |
| NiS                                                                         | Zn <sub>0.5</sub> Cd <sub>0.5</sub> S | 300 W Xe lamp with a 420 nm cut-off filter | 50/100, 0.25 M Na <sub>2</sub> SO <sub>3</sub> and 0.35 M Na <sub>2</sub> S  | 16.78                      | --    | 21 |
| C <sub>3</sub> N <sub>4</sub>                                               | rGO-                                  | 300 W Xe lamp with a                       | 30/100, 0.25 M Na <sub>2</sub> SO <sub>3</sub> and 0.35                      | 39.24                      | 37.88 | 22 |

|                       |                                                        |                                            |                                                                          |       |      |    |
|-----------------------|--------------------------------------------------------|--------------------------------------------|--------------------------------------------------------------------------|-------|------|----|
|                       | $\text{Cd}_{0.5}\text{Zn}_{0.5}\text{S}$               | 420 nm cut-off filter                      | M $\text{Na}_2\text{S}$                                                  |       |      |    |
| $\text{Ni}_2\text{P}$ | $\text{Zn}_{0.5}\text{Cd}_{0.5}\text{S-P}$             | 300 W Xe lamp with a 420 nm cut-off filter | 50/100, 0.25 M $\text{Na}_2\text{SO}_3$ and 0.35 M $\text{Na}_2\text{S}$ | 1.3   | 29   | 23 |
| CoP                   | $\text{Zn}_{0.5}\text{Cd}_{0.5}\text{S}$               | 300 W Xe lamp with a 420 nm cut-off filter | 50/100, lactic acid (10% Vol)                                            | 14.68 | --   | 24 |
| --                    | Cu/Ni-Codoped $\text{Cd}_{0.5}\text{Zn}_{0.5}\text{S}$ | 300 W Xe lamp with a 420 nm cut-off filter | 6/60, 0.25 M $\text{Na}_2\text{SO}_3$ and 0.35 M $\text{Na}_2\text{S}$   | 58.33 | 11.9 | 25 |
| --                    | 2-NTC/ZCS                                              | 300 W Xe lamp with a 420 nm cut-off filter | 50/200, 6.3 g $\text{Na}_2\text{SO}_3$ and 16.8 g $\text{Na}_2\text{S}$  | 36.6  | 51.2 | 26 |

- [1] H. Zhao, X. Ding, B. Zhang, Y. Li, C. Wang. Enhanced photocatalytic hydrogen evolution along with byproducts suppressing over Z-scheme  $\text{Cd}_x\text{Zn}_{1-x}\text{S}/\text{Au/g-C}_3\text{N}_4$  photocatalysts under visible light. *Sci. Bull.* 62 (2017) 602-609.
- [2] J. Wang, B. Li, J. Chen, N. Li, J. Zheng, J. Zhao, Z. Zhu. Enhanced photocatalytic  $\text{H}_2$ -production activity of  $\text{Cd}_x\text{Zn}_{1-x}\text{S}$  nanocrystals by surface loading MS (M = Ni, Co, Cu) species. *Appl. Surf. Sci.* 259 (2012) 118-123.
- [3] İ. Tanişik, Ö. Uğuz, D. Akyüz, R.M. Zunain Ayaz, C. Sarioğlu, F. Karaca, A.R. Özkaya, A. Koca. Solar-hydrogen production with reduced graphene oxide supported  $\text{Cd}_x\text{Zn}_{1-x}\text{S}$  photocatalysts. *Int. J. Hydrogen Energ.* 2020.
- [4] Y. Li, B. Sun, H. Lin, Q. Ruan, Y. Geng, J. Liu, H. Wang, Y. Yang, L. Wang, K. Chiu Tam. Efficient visible-light induced  $\text{H}_2$  evolution from T- $\text{Cd}_x\text{Zn}_{1-x}\text{S}/\text{defective MoS}_2$  nano-hybrid with both bulk twinning homojunctions and interfacial heterostructures. *Appl. Catal. B: Environ.* 267 (2020) 118702.
- [5] W. Zhong, X. Huang, Y. Xu, H. Yu. One-step facile synthesis and high  $\text{H}_2$ -evolution activity of suspensible  $\text{Cd}_x\text{Zn}_{1-x}\text{S}$  nanocrystal photocatalysts in a  $\text{S}^{2-}/\text{SO}_3^{2-}$  system. *Nanoscale.* 10 (2018) 19418-19426.
- [6] J. Lu, L. Cheng, J. Li, H. Liu. MOF-derived strategy for monodisperse  $\text{Cd}_{0.5}\text{Zn}_{0.5}\text{S}$  nanospheres with enhanced photocatalytic activity for hydrogen evolution. *J. Alloy. Compd.* 849 (2020) 156669.
- [7] K. Khan, X. Tao, M. Shi, B. Zeng, Z. Feng, C. Li, R. Li. Visible-Light-Driven Photocatalytic Hydrogen Production on  $\text{Cd}_{0.5}\text{Zn}_{0.5}\text{S}$  Nanorods with an Apparent Quantum Efficiency Exceeding 80%. *Adv. Funct. Mater.* (2020) 2003731.
- [8] P. Zhang, C. Xue, Y. Li, S. Guo, X. Zhang, P. Zhang, G. Shao. Rational regulation on charge spatial separation and directional migration in the yolk-shell structural  $\text{SiO}_2/\text{Ni}_2\text{P/rGO}/\text{Cd}_{0.5}\text{Zn}_{0.5}\text{S}$  nanoreactor for efficient photocatalytic  $\text{H}_2$  evolution. *Chem. Eng. J.* 404 (2021) 126497.

- [9] X. Liu, Y. Jiang, L. Zhang, Y. Zhang, Y. Li, X. Xu, K. Lin, Y. Du. In-situ construction of  $\text{Mo}_3\text{S}_4/\text{Cd}_{0.5}\text{Zn}_{0.5}\text{S}$  heterojunction: An efficient and stable photocatalyst for  $\text{H}_2$  evolution. *Int. J. Hydrogen Energ.* 45 (2020) 21014-21023.
- [10] H. Gong, Z. Li, Z. Chen, Q. Liu, M. Song, C. Huang. NiSe/ $\text{Cd}_{0.5}\text{Zn}_{0.5}\text{S}$  Composite Nanoparticles for Use in p-n Heterojunction-Based Photocatalysts for Solar Energy Harvesting. *ACS Applied Nano Materials*. 3 (2020) 3665-3674.
- [11] Z. Jin, T. Wei, F. Li, Q. Zhang, L. Xu, Fabrication of a novel  $\text{Ni}_3\text{N}/\text{Ni}_4\text{N}$  heterojunction as a non-noble metal co-catalyst to boost the  $\text{H}_2$  evolution efficiency of  $\text{Zn}_{0.5}\text{Cd}_{0.5}\text{S}$ . *New J. Chem.* 44 (2020) 3471-3477.
- [12] L. Cheng, D. Zhang, J. Fan, Y. Liao, Q. Xiang. Metal phosphide modified  $\text{Cd}_x\text{Zn}_{1-x}\text{S}$  solid solutions as a highly active visible-light photocatalyst for hydrogen evolution. *Appl. Catal. A: Gen.* 590 (2020) 117336.
- [13] Z. Zhang, Q. Yin, L. Xu, J. Zhai, C. Guo, Y. Niu, L. Zhang, M. Li, H. Wang, L. Guan, R. Zhang, H. Lu. Potassium-doped- $\text{C}_3\text{N}_4/\text{Cd}_{0.5}\text{Zn}_{0.5}\text{S}$  photocatalysts toward the enhancement of photocatalytic activity under visible-light. *J. Alloy. Compd.*, 816 (2020) 152654.
- [14] H. Zhao, H. Liu, L. Guo, C. Xing, X. Li. Modification of twin crystal  $\text{Cd}_{0.5}\text{Zn}_{0.5}\text{S}$  photocatalyst with up-conversion nanoparticles for efficient photocatalytic  $\text{H}_2$ -production. *Int. J. Hydrogen Energ.* 44 (2019) 24559-24571.
- [15] S. Li, L. Wang, N. Xiao, A. Wang, X. Li, Y. Gao, N. Li, W. Song, L. Ge, J. Liu. In-situ synthesis of ternary metal phosphides  $\text{Ni}_x\text{Co}_{1-x}\text{P}$  decorated  $\text{Zn}_{0.5}\text{Cd}_{0.5}\text{S}$  nanorods with significantly enhanced photocatalytic hydrogen production activity. *Chem. Eng. J.* 378 (2019) 122220.
- [16] X. L. Yin, L. L. Li, J. H. Jiang, X. X. Du, D. H. Pang, J. Yang, Z. J. Li, Y. X. Wang, X. Y. Li, D. C. Li, J. M. Dou. Noble-metal-free  $\text{Zn}_{0.5}\text{Cd}_{0.5}\text{S}@\text{MoS}_2$  core@shell heterostructures for visiblelight-driven  $\text{H}_2$  evolution with enhanced efficiency and stability. *Chem. Eng. J.* 375 (2019) 121970.
- [17] A. Wang, D. Dai, S. Li, N. Xiao, B. Xu, Y. Gao, L. Ge. Synthesis of novel  $\text{Co}_x\text{Mo}_{1-x}\text{S}-\text{Cd}_{0.5}\text{Zn}_{0.5}\text{S}$  composites with significantly improved photocatalytic hydrogen evolution performance under visible-light illumination. *Int. J. Hydrogen Energ.* 44 (2019) 8188-8196.
- [18] Z. Jin, T. Wei, L. Li, F. Li, R. Tao, L. Xu. Loading  $\text{Co}_3\text{N}$  nanoparticles as efficient cocatalysts over  $\text{Zn}_{0.5}\text{Cd}_{0.5}\text{S}$  for enhanced  $\text{H}_2$  evolution under visible light. *Dalton Trans.* 48 (2019) 2676-2682.
- [19] S. Dhingra, C. M. Nagaraja. Highly efficient visible-light-assisted photocatalytic hydrogen generation from water splitting catalyzed by  $\text{Zn}_{0.5}\text{Cd}_{0.5}\text{S}/\text{Ni}_2\text{P}$  heterostructures. *Int. J. Hydrogen Energ.* 43 (2018) 22917-22928.
- [20] Z. Shao, Y. He, T. Zeng, Y. Yang, X. Pu, B. Ge, J. Dou. Highly efficient photocatalytic  $\text{H}_2$  evolution using the  $\text{Ni}_2\text{P}-\text{Zn}_{0.5}\text{Cd}_{0.5}\text{S}$  photocatalyst under visible light irradiation. *J. Alloy. Compd.* 769 (2018) 889-897.
- [21] X. Zhao, J. Feng, J. Liu, W. Shi, G. Yang, G.C. Wang, P. Cheng. An Efficient, Visible-Light-Driven, Hydrogen Evolution Catalyst  $\text{NiS}/\text{Zn}_x\text{Cd}_{1-x}\text{S}$  Nanocrystal Derived from a Metal-Organic Framework. *Angew Chem Int Ed Engl.* 57 (2018) 9790-9794.
- [22] W. Xue, X. Hu, E. Liu, J. Fan. Novel reduced graphene oxide-supported  $\text{Cd}_{0.5}\text{Zn}_{0.5}\text{S}/\text{g}-\text{C}_3\text{N}_4$  Z-scheme heterojunction photocatalyst for enhanced hydrogen evolution. *Appl. Surf. Sci.*, 447 (2018) 783-794.

- [23] S. Peng, Y. Yang, J. Tan, C. Gan, Y. Li. In situ loading of Ni<sub>2</sub>P on Cd<sub>0.5</sub>Zn<sub>0.5</sub>S with red phosphorus for enhanced visible light photocatalytic H<sub>2</sub> evolution. *Appl. Surf. Sci.*, 447 (2018) 822-828.
- [24] D. Dai, H. Xu, L. Ge, C. Han, Y. Gao, S. Li, Y. Lu. In-situ synthesis of CoP co-catalyst decorated Zn<sub>0.5</sub>Cd<sub>0.5</sub>S photocatalysts with enhanced photocatalytic hydrogen production activity under visible light irradiation. *Appl. Catal. B: Environ.* 217 (2017) 429-436.
- [25] Y. Hao, S.-Z. Kang, X. Liu, X. Li, L. Qin, J. Mu. An Efficient Noble-Metal-Free Photocatalyst for Visible-Light-Driven H<sub>2</sub> Evolution: Cu/Ni-Codoped Cd<sub>0.5</sub>Zn<sub>0.5</sub>S Nanoplates. *ACS Sustain. Chem. Eng.* 5 (2016) 1165-1172.
- [26] T. T. Wei, Z. B. Jin, Y. M. Wang, F. Y. Li, L. Xu. Constructing direct Z-scheme photocatalysts with black N-TiO<sub>2-x</sub>/C and Cd<sub>0.5</sub>Zn<sub>0.5</sub>S for efficient H<sub>2</sub> production. *Int. J. Hydrogen Energ.* 46 (2021) 14236 -14246.
